# Supplementary material for: A Broad Phylogenetic Survey Unveils the Diversity and Evolution of Telomeres in Eukaryotes
Source: PubMed Central journal article supplement — Genome Biol Evol. 2013 Feb 9;5(3):468–83. doi: 10.1093/gbe/evt019 (PMC3622300; doi:10.1093/gbe/evt019), 2013-02-09
Supplement: supp_evt019_Supplementary_material_Fulneckova.pdf [file supp_evt019_Supplementary_material_Fulneckova.pdf]

**Fulnečková et al. 2013. A broad phylogenetic survey unveils the diversity and evolution of telomeres in eukaryotes.**

**Supplementary material online**

***TRAP assay***

Telomerases are known to protect broken non-telomeric DNA by addition of telomeric repeats *de novo*, and the ability of telomerases to utilize non-telomeric substrates for telomere repeat addition is used in the TRAP assay (fig. S2A). In this PCR-based method telomerase elongates a non-telomeric substrate oligonucleotide. Then the product is amplified in the second step by PCR using the same non-telomeric substrate primer and a telomeric oligonucleotide as a reverse primer. The telomerase-enriched fractions for TRAP assays were purified from the “crude extract” by precipitation with 10% PEG 8000. We compared telomerase activity in samples of crude protein extracts (without PEG precipitation), the telomerase-enriched fractions and the fractions of proteins not precipitated by PEG. The TRAP assay (fig. S2A) was performed in two phases (Sýkorová et al. 2003). In the extension step, 10 pmol of a substrate primer (47F; Fojtová et al. 2002) was elongated at 26°C for 45 min in a reaction mix with the telomerase-enriched extract containing 0.1-1 µg of total protein. After the extension step, samples were heat-inactivated, then a mixture containing 10 pmol of a reverse primer (TELPR30-3A; Fulnečková et al. 2012) and 2 units of DyNazyme II Polymerase (Finnzymes) was added and PCR amplification of the TRAP product was performed.

***Alternative template usage***

The template region of any telomerase RNA subunit is a short sequence matching usually one and a half of the telomere repeat synthesized (fig. S2D, on right). Enzymatic properties of telomerases differ e.g. in the accuracy of telomere repeat synthesis (Sykorova et al. 2003; Weiss-Schneeweiss et al. 2004), limited usage of non-telomeric substrate oligonucleotides (Fitzgerald et al. 1996) or flexibility in annealing to the template region (Sykorova et al. 2006b). The RNA subunit of green algal telomerases has not been identified yet, but according to known properties of other telomerases (Cifuentes-Rojas et al. 2011; Chen et al. 2000) some prediction could be made. The TRAP assay (see (Fajkus 2006) for review) comprises two subsequent steps (i) elongation of the substrate primer by telomerase and (ii) amplification of elongated product by PCR. During the elongation step of the TRAP assay, the 3'-end of the substrate oligonucleotide anneals to the template region within the RNA subunit (fig. S2D, on right). The positioning of the substrate oligonucleotide onto the template region sequence is delimited by biochemical properties of the protein subunit. Then telomerase adds nucleotides up to the 3'-end of the template region using its reverse transcriptase activity. After that, the elongated substrate primer is moved into position at the

5' end of the template region and next round of annealing and synthesis is completed (see (Kelleher et al. 2002) for review). Synthesis of the first telomeric repeat sets a new and uniform 3'-end of the elongated substrate primer and this makes next synthesis regular. In the PCR step, telomerase-elongated products are amplified using a substrate primer and a telomere reverse primer. The TRAP products show a typical ladder of products with a periodicity matching the length of telomeric repeat synthesized, e.g. a 6-nucleotide periodicity for the human-type repeat TTAGGG and a 7-nucleotide periodicity for the *Arabidopsis*-type repeat TTTAGGG.

Fitzgerald et al. (Fitzgerald et al. 1996) reported the most important part of a non-telomeric substrate sequence at its 3'-end. The substrate primers 47F and pSSyF differ in their 3'-end sequence and thus use a different part of the putative template region. The pattern of TRAP products shown in fig. S2 suggests that the 47F primer anneals to a similar position within the template region of algal and *Arabidopsis* telomerases. However, using the substrate primer pSSyF, the TRAP assay displays the same result for *Arabidopsis* telomerase and *Jaagiella alpicola* (TEL84, Trebouxiophyceae) but different for *Arabidopsis* and four other algal strains representing Trebouxiophyceae (TEL88 *Heterochlorella luteoviridis*, TEL90 *Auxenochlorella protothecoides*), Chlorophyceae (TEL98 *Chromochloris zofingiensis*), and Xanthophyceae (TEL202 *Pleurochloris meiringensis*)(fig. S2). A similar duality in template region usage was observed in plants (Sykorova et al. 2006b). The primer pSSyF could possibly anneal at two different sites within the template region (Fig. S2D, on right), resulting in addition of portions of the telomeric repeat differing by one nucleotide (fig. S2D, on left;). The telomere reverse primer TELP30-3A, which has the triplet AAA at the 3' end, would then anneal at different positions with respect to the end of the substrate primer, depending on the position of the triplet TTT most proximal to the substrate oligonucleotide. This would result in a different length of the shortest TRAP product (Fig. S2B, C, arrows). The preference of the substrate primer annealing site is driven by the telomerase protein subunit and could be very strong, showing a complete shift of the ladder (e.g. TEL98 *Chromochloris zofingiensis* and TEL202 *Pleurochloris meiringensis*), or weaker, showing a different amount of the two shortest TRAP products synthesized (e.g. TEL88 *Heterochlorella luteoviridis* and TEL90 *Auxenochlorella protothecoides*). Tight restriction to the substrate oligonucleotide sequence is apparent in Xanthophyceae (fig. S2C). The algal strain TEL204 *Heterococcus protonematoides* is not able to utilize the substrate oligonucleotide pSSyF in contrast to TEL202 *Pleurochloris meiringensis* that display a result similar to three green algal strains shown in fig. S2B.

### ***Detection of telomere-like minisatellite repeats by Southern hybridization***

The problem of multiple positive hybridization signals provided by different sequence variants of telomeric repeat probes was first addressed by Allshire et al. (Allshire et al. 1989) who compared

signals of (TTGGGG)<sub>n</sub>, (TTAGGG)<sub>n</sub> and (TTTAGGG)<sub>n</sub> probes hybridized onto human telomeres. They found that the signal of (TTGGGG)<sub>n</sub> on human DNA corresponds to the presence of this sequence rather than to cross-hybridization. With more types of telomeric repeats identified in eukaryotic organisms, the question is repeatedly asked whether the candidate sequences might just be cross-hybridizing to a uniform tandem repeat or if there could be several types of repeat motifs which would contribute to a heterogeneous repetitive telomeric region. A specific hybridization with telomere minisatellite sequences representing seven telomere types have been demonstrated by Neplechová et al. (Neplechova et al. 2005) despite the sequence similarity among minisatellites. A high specificity of detection was achieved by various conditions of hybridization, washing, and probe preparation. The most problematic was evaluation of signals using the *Arabidopsis*-type probe (TTTAGGG) onto control samples containing the *Chlamydomonas*-type telomeric sequence (TTTTAGGG) and high stringency conditions for washing were recommended to avoid cross-hybridization. It could be hypothesized the cross-hybridization is caused by a high similarity between these sequence types.

Our collection comprised several algal strains with the *Chlamydomonas*-type of telomeric sequence (Klebsormidiophyceae), which was identified as the “true” telomeric repeat synthesized by telomerase (see Results and fig. 1G), and the strain TEL97 *Klebsormidium subtilissimum* with the TTTTAGG-type of telomeric repeat. Such a difference in the telomeric repeat type could be possible because the sequence synthesized by telomerase is purely defined in the template region of the telomerase RNA subunit and mutation within this region leads to synthesis of a variant type (Sykorova et al. 2003). A similar transition of the minisatellite sequence from the TTTAGGG-type to the TTTAGG-type has been reported in telomeres of the apicomplexan *Cryptosporidium parvum* (Liu et al. 1998). We investigated occurrence of the TTTTAGGG-type and TTTTAGG-type repeats in the genome of *Klebsormidium subtilissimum* (TEL97) using Southern hybridization on the BAL 31 digested samples (fig. S3) and various washing conditions (not shown). The pattern of both probes remained the same when using low stringency (2xSSC, 0.1% SDS; fig. S3) or two more stringent washing solutions (1xSSC, 0.1% SDS and 0.6xSSC, 0.1% SDS) and a gradual decrease of the overall signal strength corresponding to stringency of washing was observed. This result suggests most likely cross-hybridization of both probes and impossibility to distinguish between their signals using Southern hybridization. We presume that the telomerase of TEL97 could synthesize variant telomeric repeats as suggested by the TRAP assay (fig. 1G) and they may form a small portion at the chromosomal ends in comparison to a predominant *Chlamydomonas*-type in subtelomeres. Synthesis of a different telomere type and occurrence of ancestral telomeric minisatellites in subtelomeres and/or internal chromosomal regions was reported also in plants

(Hyacinthaceae, Asparagales) with the human-type repeat synthesized by telomerase and *Arabidopsis*-type minisatellites present in the genome (Adams et al. 2001; Sykorova et al. 2003). Comparison of the hybridization pattern revealed a different quality of genomic DNA (gDNA) samples and high-molecular-weight DNA (HMW-DNA) samples prepared by proteinase K method in solution and in agarose blocks, respectively. We experienced very weak signals of several gDNA samples used in a dot-blot hybridization experiment (fig. 3) and in a TRF analysis (not shown) when compared to HMW-DNA samples used in a BAL 31 digestion experiment (a representative sample shown in fig. S4A). The proteinase K method was previously suitable for preparation of genomic DNA from a collection of strains from the green algal phylum Chlorophyta (Fulneckova et al. 2012). The collection analysed here comprises a much wider spectrum of organisms and not surprisingly, we experienced problems with isolation of gDNA samples e.g. from Zygnematophyceae and rhodophytes. We presume that a poor quality of gDNA samples caused also the inconsistent Southern hybridization results mentioned above. In contrast to gDNA samples prepared in solution, the HMW-DNA samples are prepared using basically the same protocol but the material is embedded into agarose blocks. These blocks are incubated in extraction solution several times and washed during preparation so the impurities are effectively removed from HMW-DNA samples.

### **Supplementary tables**

**Table S1.** Algal strains used for this study

**Table S2.** Oligonucleotide sequences

**Table S3.** Telomerase enrichment in protein fractions during PEG purification

**Table S4.** Negative TRAP assays

**Table S5.** Telomere sequences search in genome databases

### **Supplementary figures**

**Fig. S1.** Analysis of inhibitory effect of algal proteins to *Arabidopsis thaliana* telomerase.

**Fig. S2.** Different primer usage.

**Fig. S3.** Analysis of telomeres in *Klebsormidium subtilissimum*.

**Fig. S4.** Analysis of telomeres in *Klebsormidium crenulatum* and *Vischeria punctata*.

**Fig. S5.** TRAP assay of rhodophytes.

**Table S1. Algal strains used for this study**

The assignment of the strains into phyla and classes has been confirmed by sequencing the 18S rDNA and/or ITS loci where appropriate (in cases where the morphology of the strain itself was inconclusive; data not shown). The strain CCAP 881/1 is assigned into *Heterotrichella gracilis* Reisinger by the CCAP collection, but it is not the authentic strain and its morphology does not fit the description of *H. gracilis*. The latter species presumably belongs to Xanthophyceae, whereas CCAP 881/1 is a green alga related to the genus *Raphidonema* in the class Trebouxiophyceae (data not shown). Therefore, we put the name “*Heterotrichella gracilis*” into quotation marks. The strains were obtained from the following culture collections: SAG – Sammlung von Algenkulturen, University of Goettingen (<http://www.uni-goettingen.de/en/184983.html>), CCAP – Culture Collection of Algae and Protozoa, SAMS, Oban (<http://www.ccap.ac.uk/>), UTEX – The Culture Collection of Algae at the University of Texas at Austin (<http://web.biosci.utexas.edu/utex/>), CAUP – Culture Collection of Algae of Charles University in Prague (<http://botany.natur.cuni.cz/algo/caup.html>), NCMA (formerly CCMP) – National Center for Marine Algae and Microbiota, Bigelow Laboratory for Ocean Sciences (<https://ncma.bigelow.org/>).

| Phylum      | Class               | TEL                                | Species                               | Strain number |
|-------------|---------------------|------------------------------------|---------------------------------------|---------------|
| Glaucophyta |                     | 195                                | <i>Glaucocestis nostochinearum</i>    | SAG 45.88     |
| Rhodophyta  | Porphyridiophyceae  | 131                                | <i>Porphyridium purpureum</i>         | CCAP 1380/3   |
|             | Rhodellophyceae     | 213                                | <i>Rhodella maculata</i>              | SAG 45.85     |
|             | Stylonematophyceae  | 214                                | <i>Rhodosorus marinus</i>             | SAG 116.79    |
| Chlorophyta | Chlorophyceae       | 104                                | <i>Chlamydomonas hydra</i>            | SAG 4.73      |
|             |                     | 87                                 | <i>Scenedesmus vacuolatus</i>         | SAG 211-8b    |
|             |                     | 89                                 | <i>Muriella decolor</i>               | SAG 249-2     |
|             |                     | 91                                 | <i>Mychonastes homosphaera</i>        | SAG 6.95      |
|             |                     | 98                                 | <i>Chromochloris zofingiensis</i>     | SAG 211-14    |
|             |                     | 108                                | <i>Neochloris conjuncta</i>           | SAG 78.80     |
|             |                     | 123                                | <i>Chlorococcum hypnosporum</i>       | SAG 213-6     |
|             |                     | 138                                | <i>Pseudomuriella aurantiaca</i>      | SAG 249-1     |
|             |                     | 140                                | <i>Follicularia paradoxalis</i>       | SAG 33.98     |
|             |                     | 188                                | <i>Bracteacoccus cohaerens</i>        | UTEX 1272     |
|             | Trebouxiophyceae    | 01                                 | <i>Chlorella vulgaris</i>             | CCAP 211/11B  |
|             |                     | 84                                 | <i>Jaagiella alpicola</i>             | SAG 11.97     |
|             |                     | 85                                 | <i>Asterochloris phycobiontica</i>    | SAG 26.81     |
|             |                     | 88                                 | <i>Heterochlorella luteoviridis</i>   | SAG 211-4     |
|             |                     | 90                                 | <i>Auxenochlorella protothecoides</i> | SAG 211-7A    |
|             |                     | 121                                | <i>Dictyochloropsis irregularis</i>   | SAG 2036      |
|             |                     | 134                                | „ <i>Heterotrichella gracilis</i> “   | CCAP 881/1    |
|             | Chlorodendrophyceae | 211                                | <i>Tetraselmis chui</i>               | SAG 1.96      |
|             |                     | 212                                | <i>Tetraselmis striata</i>            | SAG 41.85     |
|             | Ulvophyceae         | 86                                 | <i>Planophila laetevirens</i>         | SAG 2008      |
|             |                     | 94                                 | <i>Pseudendocloniopsis botryoides</i> | SAG 465-1     |
| 111         |                     | <i>Pseudendoclonium printzii</i>   | SAG 467-1                             |               |
| 124         |                     | <i>Pseudendoclonium basiliense</i> | SAG 466-2                             |               |
| 137         |                     | <i>Desmochloris halophila</i>      | UTEX 2073                             |               |
| 139         |                     | <i>Pirula salina</i>               | SAG 1.95                              |               |

|                     |                            |                                   |                                      |             |
|---------------------|----------------------------|-----------------------------------|--------------------------------------|-------------|
| <b>Streptophyta</b> | <b>Klebsormidiophyceae</b> | <b>187</b>                        | <i>Klebsormidium crenulatum</i>      | SAG 37.86   |
|                     |                            | <b>97</b>                         | <i>Klebsormidium subtilissimum</i>   | SAG 384-1   |
|                     |                            | <b>100</b>                        | <i>Klebsormidium dissectum</i>       | SAG 2155    |
|                     |                            | <b>101</b>                        | <i>Klebsormidium flaccidum</i>       | SAG 7.91    |
|                     |                            | <b>103</b>                        | <i>Klebsormidium nitens</i>          | SAG 13.91   |
|                     | <b>Zygnematophyceae</b>    | <b>181</b>                        | <i>Zygnema circumcarinatum</i>       | SAG 698-1a  |
|                     |                            | <b>196</b>                        | <i>Micrasterias crux-melitensis</i>  | CAUP K-602  |
| <b>198</b>          |                            | <i>Mesotaenium endlicherianum</i> | SAG 12.97                            |             |
| <b>Haptophyta</b>   | <b>Pavlovophyceae</b>      | <b>210</b>                        | <i>Pavlova lutheri</i>               | SAG 926-1   |
| <b>Alveolata</b>    |                            | <b>233</b>                        | <i>Chromera velia</i>                | CCMP 2878   |
| <b>Euglenozoa</b>   | <b>Euglenophyceae</b>      | <b>185</b>                        | <i>Euglena anabaena</i>              | SAG 1224-2  |
|                     |                            | <b>206</b>                        | <i>Euglena stellata</i>              | SAG 1224-14 |
|                     |                            | <b>207</b>                        | <i>Euglena geniculata</i>            | SAG 1224-4b |
| <b>Ochrophyta</b>   | <b>Xanthophyceae</b>       | <b>95</b>                         | <i>Xanthonema cf. hormidioides</i>   | SAG 836-1   |
|                     |                            | <b>202</b>                        | <i>Pleurochloris meiringensis</i>    | SAG 860-3   |
|                     |                            | <b>203</b>                        | <i>Xanthonema hormidioides</i>       | SAG 836-1   |
|                     |                            | <b>204</b>                        | <i>Heterococcus protonematooides</i> | SAG 835-9   |
|                     |                            | <b>205</b>                        | <i>Botrydiopsis intercedens</i>      | SAG 806-3   |
|                     | <b>Eustigmatophyceae</b>   | <b>133</b>                        | <i>Eustigmatos polyphem</i>          | CCAP 860/8  |
|                     |                            | <b>201</b>                        | <i>Vischeria punctata</i>            | SAG 887-1   |
|                     | <b>Bacillariophyceae</b>   | <b>231</b>                        | <i>Phaeodactylum tricornutum</i>     | CCMP 2561   |

**Table S2. Oligonucleotide sequences**

| Name           | Sequence 5'-3'                     | Analysis               | Ref.                     |
|----------------|------------------------------------|------------------------|--------------------------|
| TS21           | GACAATCCGTCGAGCAGAGTT              | TRAP substrate         | (Fitzgerald et al. 1996) |
| CaMV           | CGTCTCAAAGCAAGTGGATT               | TRAP substrate         | (Fajkus et al. 1998)     |
| 47F            | CGCGGTAGTGATGTGGTTGTGTT            | TRAP substrate         | (Fojtova et al. 2002)    |
| pSSyF          | CTTTTGAAAAATGGATGGGTTCTTGCTTGAATT  | TRAP substrate         | this work                |
| GG(21)         | CACTATCGACTACGCGATCAG              | TRAP substrate         | (Fitzgerald et al. 1996) |
| HUTC           | AACCCTAACCCCTAACCCCTAAC            | TRAP reverse           | (Sykorova et al. 2006b)  |
| TELPR          | CCGAATTCAACCCTAAACCCTAAACCCTAAACCC | TRAP reverse           | (Fajkus et al. 1998)     |
| TELPR30-3A     | CCGAATTCAACCCTAAACCCTAAACCCTAAA    | TRAP reverse           | (Fulneckova et al. 2012) |
| T3AG2-C        | AAACCTAAACCTAAACCTAAACCTA          | TRAP reverse           | (Fulneckova et al. 2012) |
| T4AG2-C        | CCTAAACCTAAACCTAAACCTA             | TRAP reverse           | this work                |
| T4AG2-PR       | CCGAATTCAACCCTAAACCTAAACCTAAACCTA  | TRAP reverse           | this work                |
| TTATAG3-C      | CTATAACCCTATAACCCTATAA             | TRAP reverse           | this work                |
| CHTRTTTRAPRev1 | CCC TAA AAC CCT AAA ACC CTA AAA    | TRAP reverse           | this work                |
| BOTPR-32       | CCGAATTCATCCTAACCTAACCTAACCTAACCC  | TRAP reverse           | this work                |
| T2CG3-PR       | CCGAATTCAACCGAACCCGAACCCGAACC      | TRAP reverse           | this work                |
| T3G3-C         | AACCCAAACCCAAACCCAAAC              | TRAP reverse           | (Fulneckova et al. 2012) |
| T4G3-C         | AAACCCAAAACCCAAAACCCA              | TRAP reverse           | this work                |
| TTAAG3-C       | ACCCTTAACCCTTAACCCTTA              | TRAP reverse           | this work                |
| TATAG3-C       | ACCCTATACCCTATACCCTAT              | TRAP reverse           | this work                |
| ATTTAG3-C      | CTAAATCCCTAAATCCCTAAAT             | TRAP reverse           | this work                |
| TATTAG3-C      | CTAATACCCTAATACCCTAATA             | TRAP reverse           | this work                |
| CATC           | ACCCTAGACCCTAGACCCTAG              | TRAP reverse           | this work                |
| RedALTPRV-1    | CCGATATCCCATTCCCCCATTCCC           | TRAP reverse           | this work                |
| RedALTPRV-2    | CCGATATCCCCATTCCCCCATTCC           | TRAP reverse           | this work                |
| RedALTPRV-3    | CCGATATCCCCATTCCCCCATT             | TRAP reverse           | this work                |
| RedALTPRV-4    | CCGATATCCCCATTCCCCCATTCCC          | TRAP reverse           | this work                |
| RedALTPRV-5    | CCGATATCCCATTCCCCCATTCCC           | TRAP reverse           | this work                |
| RedALTPRV-6    | CCGATATCCCCTTCCCCCCTTCC            | TRAP reverse           | this work                |
| GthRedPR       | CCGAATTCTCCCCCTTCTCTCTCTC          | TRAP reverse           | this work                |
| ScRedPR        | CCGAATTCTCTCCTCTCCCTCTCTC          | TRAP reverse           | this work                |
| CHSB           | GTTTTAGGGTTTTAGGGTTTTAGGGTTTTAG    | Southern hybridization | (Sykorova et al. 2003)   |
| HUSB           | TTAGGGTTAGGGTTAGGGTTAGGGTTAG       | Southern hybridization | (Sykorova et al. 2003)   |
| ATSB           | GGTTTAGGGTTTAGGGTTTAGGGTTTAG       | Southern hybridization | (Sykorova et al. 2003)   |
| TTTAGGC-SB     | GCTTTAGGCTTTAGGCTTTAGGCTTTAG       | Southern hybridization | (Fulneckova et al. 2012) |
| TTCAGGG-SB     | TTCAGGGTTCAGGGTTCAGGGTTCAGG        | Southern hybridization | (Fulneckova et al. 2012) |
| T4AG2-SB       | TAGGTTTTAGGTTTTAGGTTTTAGGTTTTAGGTT | Southern hybridization | this work                |
| Red alga-SB    | CCCCCATTCCCCCATTCCCCCATT           | Southern hybridization | (Nozaki et al. 2007)     |
| T2CG3-SB       | GGGTTCGGGTTCGGGTTTCGGGTT           | Southern hybridization | this work                |
| T3G3-SB        | TTTGGGTTTGGGTTTGGGTTTGGGTTTG       | Southern hybridization | this work                |

**Table S3. Telomerase activity in protein fractions**

| <b>Class</b>               | <b>TEL number</b> | <b>crude</b> | <b>extract</b> | <b>supernatant</b> |
|----------------------------|-------------------|--------------|----------------|--------------------|
| <b>Glaucophyta</b>         | TEL 195           | n.a.         | +++            | +++                |
| <b>Treboxiophyceae</b>     | TEL 84            | +++          | +++            | +++                |
|                            | TEL 88            | +++          | +++            | +++                |
|                            | TEL 90            | n.a.         | +++            | +++                |
|                            | TEL 121           | +++          | +++            | +++                |
| <b>Chlorophyceae</b>       | TEL 98            | +++          | +++            | +++                |
|                            | TEL 108           | +++          | +++            | +++                |
|                            | TEL 140           | +++          | +++            | +++                |
|                            | TEL 188           | n.a.         | +++            | +++                |
|                            | TEL X-2           | +++          | +++            | +++                |
| <b>Prasinophyceae</b>      | TEL 211           | n.a.         | +++            | +++                |
|                            | TEL 212           | n.a.         | ++             | ++                 |
| <b>Klebsormidiophyceae</b> | TEL 97            | n.a.         | ++             | +/-                |
|                            | TEL 101           | n.a.         | ++             | -                  |
|                            | TEL 103           | ++           | ++             | -                  |
|                            | TEL 187           | +            | ++             | -                  |
| <b>Zygnemophyceae</b>      | TEL 181           | n.a.         | +              | +/-                |
|                            | TEL 196           | ++           | +++            | +                  |
|                            | TEL 198           | n.a.         | +++            | +                  |
| <b>Xanthophyceae</b>       | TEL 95            | n.a.         | +              | +/-                |
|                            | TEL 110           | ++           | ++             | +                  |
|                            | TEL 202           | n.a.         | +++            | ++                 |
|                            | TEL 203           | +            | ++             | +/-                |
|                            | TEL 204           | ++           | ++             | +                  |
|                            | TEL 205           | ++           | ++             | ++                 |
| <b>Haptophyta</b>          | TEL 210           | +/-          | +++            | +/-                |
| <b>Alveolata</b>           | Chromera          | n.a.         | ++             | -                  |
| <b>Euglenophyta</b>        | TEL 185           | n.a.         | +++            | +                  |
|                            | TEL 206           | +++          | +++            | +                  |
|                            | TEL 207           | n.a.         | ++             | +                  |

n.a. not analyzed, + low activity, +++ high activity, - not active



**Table S4. Negative primer combinations**

| <b>Class</b>               | <b>primer combination</b> | <b>GG(21)</b>   | <b>TS21</b>       | <b>pSSyF</b>            |
|----------------------------|---------------------------|-----------------|-------------------|-------------------------|
| <b>Rhodophyta</b>          | <b>RedALTPRV-1</b>        | TEL131,213, 214 |                   |                         |
|                            | <b>RedALTPRV-2</b>        | TEL131,213, 214 |                   |                         |
|                            | <b>RedALTPRV-3</b>        | TEL131,213, 214 |                   |                         |
|                            | <b>RedALTPRV-4</b>        | TEL131,213, 214 |                   |                         |
|                            | <b>RedALTPRV-5</b>        | TEL131,213, 214 |                   |                         |
|                            | <b>RedALTPRV-6</b>        | TEL131,213, 214 |                   |                         |
|                            | <b>GthRedPR</b>           | TEL131,213, 214 |                   |                         |
|                            | <b>ScRedPR</b>            | TEL131,213, 214 |                   |                         |
|                            | <b>T2CG3-PR</b>           |                 | TEL131,213, 214   |                         |
|                            | <b>HUTC</b>               | TEL131,213, 214 |                   |                         |
| <b>Klebsormidiophyceae</b> | <b>T3AG2-C</b>            |                 |                   | TEL97,100, 103, 187     |
|                            | <b>T3G3-C</b>             |                 |                   | TEL97,100, 103, 187     |
|                            | <b>BOTPR-33</b>           |                 |                   | TEL97,100, 103, 187     |
|                            | <b>T4G3-C</b>             | TEL97,103,187   |                   |                         |
|                            | <b>TTCTAG3-C</b>          | TEL97,103,187   |                   |                         |
|                            | <b>TTAAG3-C</b>           | TEL97,103,187   |                   |                         |
|                            | <b>TATAG3-C</b>           | TEL97,103,187   |                   |                         |
|                            | <b>ATTTAG3-C</b>          | TEL97,103,187   |                   |                         |
|                            | <b>TATTAG3-C</b>          | TEL97,103,187   |                   |                         |
|                            | <b>TTATAG3-C</b>          | TEL97,103,187   |                   |                         |
| <b>Ulvophyceae</b>         | <b>T2CG3-PR</b>           |                 | TEL187            |                         |
|                            | <b>T3AG2-C</b>            |                 |                   | TEL137                  |
|                            | <b>T3G3-C</b>             |                 |                   | TEL137                  |
|                            | <b>BOTPR-33</b>           |                 |                   | TEL92,93,94,124,137     |
|                            | <b>T4G3-C</b>             | TEL137          |                   |                         |
|                            | <b>TTCTAG3-C</b>          | TEL137          |                   |                         |
|                            | <b>TTAAG3-C</b>           | TEL137          |                   |                         |
|                            | <b>TATAG3-C</b>           | TEL137          |                   |                         |
|                            | <b>ATTTAG3-C</b>          | TEL137          |                   |                         |
|                            | <b>TATTAG3-C</b>          | TEL137          |                   |                         |
| <b>Eustigmatophyceae</b>   | <b>TTATAG3-C</b>          | TEL137          |                   |                         |
|                            | <b>T2CG3-PR</b>           |                 | TEL94,124,137,139 |                         |
|                            | <b>T4AG2-C</b>            |                 |                   | TEL86, 94, 111, 124,137 |
|                            | <b>T3AG2-C</b>            |                 |                   | TEL133, 201             |
|                            | <b>T3G3-C</b>             |                 |                   | TEL133, 201             |
|                            | <b>BOTPR-33</b>           |                 |                   | TEL133, 201             |
|                            | <b>T4G3-C</b>             | TEL133, 201     |                   |                         |
|                            | <b>TTCTAG3-C</b>          | TEL133, 201     |                   |                         |
|                            | <b>TTAAG3-C</b>           | TEL133, 201     |                   |                         |
|                            | <b>TATAG3-C</b>           | TEL133, 201     |                   |                         |
| <b>ATTTAG3-C</b>           | TEL133, 201               |                 |                   |                         |
| <b>TATTAG3-C</b>           | TEL133, 201               |                 |                   |                         |
| <b>TTATAG3-C</b>           | TEL133, 201               |                 |                   |                         |
| <b>T2CG3-PR</b>            |                           | TEL133, 201     |                   |                         |
| <b>T4AG2-C</b>             |                           |                 | TEL133, 201       |                         |

**Table S5. Telomere sequences search in genome databases**

| Major taxonomic group | subgroup        | species                                  | telomere                             | database search | accession or database      | reference                                     |                                               |
|-----------------------|-----------------|------------------------------------------|--------------------------------------|-----------------|----------------------------|-----------------------------------------------|-----------------------------------------------|
| Metazoa               | Vertebrata      | <i>Homo sapiens</i> and other vertebrata | TTAGGG                               |                 |                            | (Podlevsky et al. 2008) and references herein |                                               |
|                       | Tunicata        | <i>Oikopleura dioica</i>                 | TTAGGG                               | ???             | CABV01000000, CABW01000000 | (Podlevsky et al. 2008) and references herein |                                               |
|                       | Cephalochordata | <i>Branchiostoma floridae</i>            | TTAGGG                               | TTAGGG          | JGI                        | (Costa Castro and Holland 2002)               |                                               |
|                       | Echinodermata   |                                          | <i>Strongylocentrotus purpuratus</i> | TTAGGG          | TTAGGG                     | AAGJ04000000                                  | (Podlevsky et al. 2008) and references herein |
|                       |                 |                                          | <i>Holothuria tubulosa</i>           | TTAGGG          |                            |                                               | (Plohl et al. 2002)                           |
|                       | Arthropoda      |                                          | <i>Drosophila melanogaster</i>       | Het-A, TART     |                            |                                               | (Podlevsky et al. 2008) and references herein |
|                       |                 |                                          | <i>Anopheles gambiae</i>             | recombination   |                            |                                               | (Podlevsky et al. 2008) and references herein |
|                       |                 |                                          | <i>Apis mellifera</i>                | TTAGG           | TTAGG                      | AADG06000000                                  | (Podlevsky et al. 2008) and references herein |
|                       |                 |                                          | <i>Tribolium castaneum</i>           | TCAGG           | TCAGG                      | AAJJ01000000                                  | (Mravinac et al. 2011)                        |
|                       |                 |                                          | <i>Tenebrio molitor</i>              | TCAGG           |                            |                                               | (Mravinac et al. 2011)                        |
|                       |                 |                                          | <i>Penaeus japonicus</i>             | TTAGG           |                            |                                               | (Lang et al. 2004)                            |
|                       |                 |                                          | <i>Bombyx mori</i>                   | TTAGG           |                            |                                               | (Podlevsky et al. 2008) and references herein |
|                       |                 |                                          | <i>Acyrtosiphon pisum</i>            | TTAGG           | TTAGG                      | ABLF02000000                                  | (Monti et al. 2011) (2010)                    |
|                       |                 |                                          | <i>Megoura viciae</i>                | TTAGG           |                            |                                               | (Monti et al. 2011)                           |
|                       |                 |                                          | <i>Myzus persicae</i>                | TTAGG           |                            |                                               | (Monti et al. 2011)                           |
|                       | Nematoda        |                                          | <i>Rhopalosiphum padi</i>            | TTAGG           |                            |                                               | (Monti et al. 2011)                           |
|                       |                 |                                          | <i>Ephestia kuehniella</i>           | TTAGG           |                            |                                               | (Traut et al. 2007)                           |
|                       |                 |                                          | <i>Chironomus tenants</i>            | satellites      |                            |                                               | (Podlevsky et al. 2008) and references herein |
|                       |                 |                                          | <i>Ascaris lumbricoides</i>          | TTAGGC          |                            |                                               | (Podlevsky et al. 2008) and references herein |
|                       |                 |                                          | <i>Caenorhabditis elegans</i>        | TTAGGC          |                            |                                               | (Podlevsky et al. 2008) and references herein |
| Mollusca              |                 | <i>Caenorhabditis remanei</i>            | TTGCA                                | TTAGGC          | AAGD02000000               | (Podlevsky et al. 2008) and references herein |                                               |
|                       |                 | <i>Parascaris univalens</i>              |                                      |                 |                            |                                               |                                               |
|                       |                 | <i>Donax trunculus</i>                   | TTAGGG                               |                 |                            | (Plohl et al. 2002)                           |                                               |
|                       |                 | <i>Mytilus galloprovincialis</i>         | TTAGGG                               |                 |                            | (Plohl et al. 2002)                           |                                               |
|                       |                 | <i>Haliotis rufescens</i>                | TTAGGG                               |                 |                            | (Gallardo-Escarate et al. 2005)               |                                               |
|                       |                 | <i>Argopecten irradians</i>              | TTAGGG                               |                 |                            | (Estabrooks 1999)                             |                                               |
| Metazoa               | Annelida        | <i>Platynereis dumerilii</i>             | TTAGGG                               |                 |                            | (Jha et al. 1995)                             |                                               |

|                  |               |                                    |          |          |              |                               |
|------------------|---------------|------------------------------------|----------|----------|--------------|-------------------------------|
|                  |               | <i>Pomatoceros lamarckii</i>       | TTAGGG   |          |              | (Jha et al. 1995)             |
|                  |               | <i>Octodrilus complanatus</i>      | TTAGGG   |          |              | (Vitturi et al. 2002a)        |
|                  |               | <i>Haemopsis sanguisuga</i>        | TTAGGG   |          |              | (Vitturi et al. 2002b)        |
| Platyhelminthes  |               | <i>Schistosoma mansoni</i>         | TTAGGG   |          |              | (Hirai and LoVerde 1996)      |
|                  |               | <i>Schmidtea mediterranea</i>      | TTAGGG   |          |              | (Tan et al. 2012)             |
| Ctenophora       |               | <i>Pleurobrachia pileus</i>        | TTAGGG   |          |              | (Traut et al. 2007)           |
| Cnidaria         |               | <i>Madracis auretenra</i>          | TTAGGG   |          |              | (Zielke and Bodnar 2010)      |
|                  |               | <i>Madracis decactis</i>           | TTAGGG   |          |              | (Zielke and Bodnar 2010)      |
|                  |               | <i>Aurelia aurita</i>              | TTAGGG   |          |              | (Traut et al. 2007)           |
|                  |               | <i>Chrysaora hysoscella</i>        | TTAGGG   |          |              | (Traut et al. 2007)           |
|                  |               | <i>Cyanea lamarcki</i>             | TTAGGG   |          |              | (Traut et al. 2007)           |
|                  |               | <i>Sanderia malayensis</i>         | TTAGGG   |          |              | (Traut et al. 2007)           |
|                  |               | <i>Tripedalia cystophora</i>       | TTAGGG   |          |              | (Traut et al. 2007)           |
|                  |               | <i>Acropora surculosa</i>          | TTAGGG   |          |              | (Sinclair et al. 2007)        |
|                  |               | <i>Nematostella vectensis</i>      | TTAGGG   |          |              | (Traut et al. 2007)           |
|                  |               | <i>Hydra vulgaris</i>              | TTAGGG   |          |              | (Traut et al. 2007)           |
|                  |               | <i>Hydra magnipapillata</i>        | TTAGGG   |          |              | (Anokhin et al. 2010)         |
| Placozoa         |               | <i>Trichoplax adhaerens</i>        | TTAGGG   |          |              | (Traut et al. 2007)           |
| Porifera         |               | <i>Leucosolenia sp.</i>            | TTAGGG   |          |              | (Traut et al. 2007)           |
|                  |               | <i>Sycon sp.</i>                   | TTAGGG   |          |              | (Traut et al. 2007)           |
|                  |               | <i>Eunapius fragilis</i>           | TTAGGG   |          |              | (Traut et al. 2007)           |
|                  |               | <i>Suberites domuncula</i>         | TTAGGG   |          |              | (Koziol et al. 1998)          |
|                  |               | <i>Geodia cydonium</i>             | TTAGGG   |          |              | (Koziol et al. 1998)          |
|                  |               | <i>Leucetta chagosensis</i>        | TTAGGG   |          |              | (Sakai et al. 2007)           |
|                  |               | <i>Halichondria japonica</i>       | TTAGGG   |          |              | (Sakai et al. 2007)           |
|                  |               | <i>Halichondria panicea</i>        | TTAGGG   |          |              | (Sakai et al. 2007)           |
| Choanoflagellata |               | <i>Monosiga brevicollis</i>        | TTAGGG   | TTAGGG   | JGI          | (Robertson 2009)              |
|                  |               | <i>Codosiga gracilis</i>           | TTAGGG   |          |              | (Traut et al. 2007)           |
| Fungi            | Basidiomycota | <i>Coprinopsis cinerea</i>         | TTAGGG   | TTAGGG   | AACS02000000 | (Stajich et al. 2010)         |
|                  |               | <i>Phanerochaete chrysosporium</i> |          | TTTAGGG  | AADS01000000 | (Ramirez et al. 2011)         |
|                  |               | <i>Ceriporiopsis subvermispora</i> | TTAGGG   |          |              | (Fernandez-Fueyo et al. 2012) |
|                  |               | <i>Pleurotus ostreatus</i>         | TTAGGG   |          |              | (Perez et al. 2009)           |
|                  |               | <i>Dacryopinax sp.</i>             |          | TTAGGG   | AEUS01000000 |                               |
|                  |               | <i>Cryptococcus neoformans</i>     | TTAGGGGG | TTAGGGGG | AAEY01000000 | (Edman 1992)                  |
|                  |               | var. <i>neoformans</i>             |          |          |              |                               |
|                  |               | <i>Ustilago maydis</i>             | TTAGGG   | TTAGGG   | AACP01000000 | (Sanchez-Alonso et al. 1996)  |
|                  |               | <i>Puccinia triticina</i>          |          | TTAGGG   | ADAS01000000 |                               |
|                  |               | <i>Helicobasidium mompa</i>        | TTAGGG   |          |              | (Aimi et al. 2003)            |
|                  |               | <i>Rhodotorula glutinis</i>        |          | TTAGGG   | AEVR01000000 |                               |
| Fungi            | Basidiomycota | <i>Wallemia sebi</i>               |          | TTAGG    | AFQX01000000 |                               |

|  |                               |                                                              |                               |                |                      |                                               |
|--|-------------------------------|--------------------------------------------------------------|-------------------------------|----------------|----------------------|-----------------------------------------------|
|  | Taphrinomycotina              | <i>Schizosaccharomyces pombe</i>                             | G2-8TTAC(A)                   |                |                      | (Podlevsky et al. 2008) and references herein |
|  | Saccharomycotina              | <i>Yarrowia lipolytica</i>                                   | GGACGATTG                     |                |                      | (Podlevsky et al. 2008) and references herein |
|  |                               | <i>Debaryomyces hansenii</i>                                 | ATGTTGAGGTGTAGGG              |                |                      | (Podlevsky et al. 2008) and references herein |
|  |                               | <i>Candida albicans</i>                                      | ACGGATGTCTAACTTC<br>TTGGTGT   |                |                      | (Podlevsky et al. 2008) and references herein |
|  |                               | <i>Pichia stipitis</i>                                       | GGATCTTTTCACGTCT<br>TGCGGTA   |                |                      | (Podlevsky et al. 2008) and references herein |
|  |                               | <i>Saccharomyces cerevisiae</i>                              | T(G)2-3(TG)1-6                | T(G)2-3(TG)1-6 | AAEG01000000         | (Podlevsky et al. 2008) and references herein |
|  |                               | <i>Kluyveromyces lactis</i>                                  | ACGGATTTGATTAGGTA<br>TGTGGTGT |                |                      | (Podlevsky et al. 2008) and references herein |
|  |                               | <i>Eremothecium gossypii</i>                                 | GTGTGGTGTATGGGTC<br>TCTCAGCG  |                |                      | (Podlevsky et al. 2008) and references herein |
|  | Pezizomycotina                | <i>Botryotinia fuckeliana</i><br>( <i>Botrytis cinerea</i> ) | TTAGGG                        | TTAGGG         | AAID01000000         | (Levis et al. 1997)                           |
|  |                               | <i>Sclerotinia sclerotiorum</i>                              | TTAGGG                        | ???            | AAGT01000000         | (Levis et al. 1997)                           |
|  |                               | <i>Hypocrea jecorina</i><br>( <i>Trichoderma reesei</i> )    | TTAGGG                        | TTAGGG         | AAIL02000000         | (Martinez et al. 2008)                        |
|  |                               | <i>Nectria haematococca</i>                                  |                               | TTAGGG         | JGI                  |                                               |
|  |                               | <i>Gibberella zeae</i>                                       | TTAGGG                        | TTAGGG?        | AACM02000000         | (Cuomo et al. 2007)                           |
|  |                               | <i>Acremonium alcalophilum</i>                               |                               | TTAGGG         | JGI                  |                                               |
|  |                               | <i>Neurospora crassa</i>                                     | TTAGGG                        |                |                      | (Podlevsky et al. 2008) and references herein |
|  |                               | <i>Neurospora tetrasperma</i>                                |                               | TTAGGG         | JGI                  |                                               |
|  |                               | <i>Podospora anserina</i>                                    | TTAGGG                        |                |                      | (Podlevsky et al. 2008) and references herein |
|  |                               | <i>Chaetomium thermophilum</i>                               |                               | TTAGGG         | BORK                 |                                               |
|  |                               | <i>Thielavia terrestris</i>                                  |                               | TTAGGG         | JGI                  | (Berka et al. 2011)                           |
|  |                               | <i>Thielavia heterothallica</i>                              |                               | TTAGGG         | JGI                  | (Berka et al. 2011)                           |
|  |                               | <i>Magnaporthe oryzae</i><br>(= <i>Magnaporthe grisea</i> )  | TTAGGG                        | TTAGGG         | AACU03000000         | (Levis et al. 1997)                           |
|  |                               | <i>Aspergillus fumigatus</i>                                 | TTAGGG                        | TTAGGG         | AAHF01000000         | (Podlevsky et al. 2008) and references herein |
|  |                               | <i>Aspergillus oryzae</i>                                    | TTAGGGTCAACA                  | ???            |                      | (Kusumoto et al. 2003)                        |
|  |                               | <i>Emericella nidulans</i>                                   |                               | TTAGGG         | AACD01000000         |                                               |
|  |                               | <i>Uncinocarpus reesii</i>                                   |                               | TTAGGG         | AAIW01000000         |                                               |
|  | <i>Coccidioides immitis</i>   |                                                              | TTAGGG                        | AAEC01000000   |                      |                                               |
|  | <i>Coniosporium apollinis</i> |                                                              | TTAGGG                        | AJKL01000000   |                      |                                               |
|  | <i>Exophiala dermatitidis</i> |                                                              | TTTAGGG                       | AFPA01000000   |                      |                                               |
|  | <i>Xanthoria parietina</i>    |                                                              | TTAGGG                        | JGI            |                      |                                               |
|  | <i>Beauveria bassiana</i>     | TTAGGG                                                       |                               |                | (Viaud et al. 1996)  |                                               |
|  | <i>Rosellinia necatrix</i>    | TTAGGG                                                       |                               |                | (Aimi et al. 2002)   |                                               |
|  | <i>Paecilomyces strain</i>    | TTAGGG                                                       |                               |                | (Inglis et al. 2005) |                                               |

Fungi

Pezizomycotina

|                |                     |                                       |                                                                  |            |                                                                                                                                                                         |                                                             |
|----------------|---------------------|---------------------------------------|------------------------------------------------------------------|------------|-------------------------------------------------------------------------------------------------------------------------------------------------------------------------|-------------------------------------------------------------|
|                |                     | <i>Leptophaeria maculans</i>          | TTAGGG                                                           |            |                                                                                                                                                                         | (Leclair et al. 1996)                                       |
|                |                     | <i>Cladosporidium fulvum</i>          | TTAGGG                                                           |            |                                                                                                                                                                         | (Coleman et al. 1993)                                       |
|                | Glomeromycota       | <i>Glomus intraradices</i>            | TTAGGG                                                           |            |                                                                                                                                                                         | (Hijri et al. 2007)                                         |
|                | Mucoromycotina      | <i>Rhizopus oryzae</i>                | TTGTGG                                                           |            |                                                                                                                                                                         | (Ma et al. 2009)                                            |
|                |                     | <i>Mucor circinelloides</i>           |                                                                  | TTAGGG     | JGI                                                                                                                                                                     |                                                             |
|                | Mortierellomycotina | <i>Mortierella alpina</i>             |                                                                  | TTTTTTAGGG | ADAG01000000                                                                                                                                                            |                                                             |
|                | Blastocladiomycota  | <i>Allomyces macrogynus</i>           |                                                                  | T(2-6)AGG  | ACDU01000000                                                                                                                                                            |                                                             |
|                |                     | <i>Catenaria anguillulae</i>          |                                                                  | TTTAGG     | JGI                                                                                                                                                                     |                                                             |
|                | Chytridiomycota     | <i>Batrachochytrium dendrobatidis</i> |                                                                  | TTAGGG     | ADAR01000000                                                                                                                                                            |                                                             |
|                |                     | <i>Spizellomyces punctatus</i>        |                                                                  | TTAGGG     | ACOE01000000                                                                                                                                                            |                                                             |
|                |                     | <i>Gonapodya prolifera</i>            |                                                                  | TTAGGG     | JGI                                                                                                                                                                     |                                                             |
| Microsporidia  |                     | <i>Encephalitozoon cuniculi</i>       | G(A/G)GCCT(C/T)CT,<br>GAGCCTTGTTT,<br>GAGACGCAGTGTTGC<br>CAGGATG | ???        | AEWD01000000                                                                                                                                                            | (Podlevsky et al. 2008)<br>and references herein            |
| Amoebozoa      | Dictyostelida       | <i>Dictyostelium discoideum</i>       | palindrome arm                                                   | ???        | AAFI02000000                                                                                                                                                            | (Heidel et al. 2011)                                        |
|                |                     | <i>Polysphodylium pallidum</i>        | TAAGGG                                                           |            |                                                                                                                                                                         | (Heidel et al. 2011)                                        |
|                |                     | <i>Dictyostelium fasciculatum</i>     | TTAGGG                                                           | TTAGGG     | ADHC01000000                                                                                                                                                            | (Heidel et al. 2011)                                        |
|                | Myxogastria         | <i>Physarum polycephalum</i>          | TTAGGG                                                           |            |                                                                                                                                                                         | (Podlevsky et al. 2008)<br>and references herein            |
|                | Lobosea             | <i>Acanthamoeba castellanii</i>       |                                                                  | TTAGGG     | AEYA01000000                                                                                                                                                            |                                                             |
| Excavata       | Fornicata           | <i>Giardia lamblia</i>                | TAGGG                                                            | TAGGG      | ACVC01000000                                                                                                                                                            | (Le Blancq et al. 1991)                                     |
|                | Euglenozoa          | <i>Trypanosoma brucei</i>             | TTAGGG                                                           |            |                                                                                                                                                                         | (Van der Ploeg et al. 1984)                                 |
|                |                     | <i>Trypanosoma cruzi</i>              | TTAGGG                                                           |            |                                                                                                                                                                         | (Van der Ploeg et al. 1984)                                 |
|                |                     | <i>Leishmania major</i>               | TTAGGG                                                           |            |                                                                                                                                                                         | (Fu and Barker 1998)                                        |
|                |                     | <i>Bodo saltans</i>                   |                                                                  | TTAGGG?    | WTSI<br>( <a href="http://www.sanger.ac.uk/resources/downloads/protozoa/bodo-saltans.html">http://www.sanger.ac.uk/resources/downloads/protozoa/bodo-saltans.html</a> ) |                                                             |
|                | Heterolobosea       | <i>Naegleria gruberi</i>              |                                                                  | TTTGGG     | JGI                                                                                                                                                                     |                                                             |
|                | Jakobida            | <i>Andalucia godoyi</i>               |                                                                  | TTAGGG     |                                                                                                                                                                         | Eliáš et al.,<br>unpublished<br>genome sequence<br>assembly |
|                | Malawimonadida      | <i>Malawimonas californiana</i>       |                                                                  | TTAGGG     |                                                                                                                                                                         | Eliáš et al.,<br>unpublished<br>genome sequence<br>assembly |
| Chloroplastida | Embryophyta         | <i>Arabidopsis thaliana</i>           | TTTAGGG                                                          |            |                                                                                                                                                                         | (Podlevsky et al. 2008)<br>and references herein            |
| Chloroplastida | Embryophyta         | <i>Populus trichocarpa</i>            | TTTAGGG                                                          |            |                                                                                                                                                                         | (Podlevsky et al. 2008)                                     |

|             |                  |                                                |            |               |                                                                                                                     |                                               |
|-------------|------------------|------------------------------------------------|------------|---------------|---------------------------------------------------------------------------------------------------------------------|-----------------------------------------------|
|             |                  | <i>Vitis vinifera</i>                          | TTTAGGG    |               |                                                                                                                     | and references herein (Podlevsky et al. 2008) |
|             |                  | <i>Oryza sativa</i>                            | TTTAGGG    |               |                                                                                                                     | and references herein (Podlevsky et al. 2008) |
|             |                  | <i>Aloe</i> sp.                                | TTAGGG     |               |                                                                                                                     | and references herein (Podlevsky et al. 2008) |
|             |                  | <i>Iris tectorum</i>                           | TTAGGG     |               |                                                                                                                     | and references herein (Sykorova et al. 2003)  |
|             |                  | <i>Ipheion uniflorum</i>                       | TTAGGG     |               |                                                                                                                     | (Sykorova et al. 2006a)                       |
|             |                  | <i>Selaginella martensii</i>                   | TTTAGGG    |               |                                                                                                                     | (Fuchs and Schubert 1996)                     |
|             |                  | <i>Psilotum nudum</i>                          | TTTAGGG    |               |                                                                                                                     | (Suzuki 2004)                                 |
|             |                  | <i>Marchantia paleacea</i> var. <i>diptera</i> | TTTAGGG    |               |                                                                                                                     | (Suzuki 2004)                                 |
|             |                  | <i>Pellia epiphylla</i>                        | TTTAGGG    |               |                                                                                                                     | (Fuchs et al. 1995)                           |
|             |                  | <i>Zamia furfuracea</i>                        | TTTAGGG    |               |                                                                                                                     | (Fuchs et al. 1995)                           |
|             |                  | <i>Barbula unguiculata</i>                     | TTTAGGG    |               |                                                                                                                     | (Suzuki 2004)                                 |
|             |                  | <i>Physcomitrella patens</i>                   | TTTAGGG    |               |                                                                                                                     | (Rensing et al. 2008; Shakirov et al. 2010)   |
|             | Mamiellophyceae  | <i>Ostreococcus lucimarinus</i>                | TTTAGGG    |               |                                                                                                                     | (Derelle et al. 2006)                         |
|             |                  | <i>Ostreococcus tauri</i>                      | TTTAGGG    | TTTAGGG       | JGI                                                                                                                 |                                               |
|             |                  | <i>Micromonas pusilla</i>                      |            | TTTAGGG       | ACCP01000000                                                                                                        |                                               |
|             | Trebouxiophyceae | <i>Chlorella variabilis</i>                    |            | TTTAGGG       | ADIC01000000                                                                                                        |                                               |
|             |                  | <i>Coccomyxa subellipsoidea</i> C-169          | TTTAGGG    | TTTAGGG       | AGBL01000000                                                                                                        | (Higashiyama et al. 1995)                     |
|             |                  | <i>Asterochloris</i> sp.                       |            | TTTAGGG       | JGI                                                                                                                 |                                               |
|             | Chlorophyceae    | <i>Chlamydomonas reinhardtii</i>               | TTTTAGGG   |               |                                                                                                                     | (Petracek et al. 1990)                        |
|             |                  | <i>Volvox carteri</i>                          |            | TTTTAGGG      | JGI                                                                                                                 |                                               |
| Rhodophyta  | Cyanidiophyceae  | <i>Cyanidioschyzon merolae</i>                 | AATG6      | AATG6         | TOKYO                                                                                                               | (Nozaki et al. 2007)                          |
|             |                  | <i>Galdieria sulphuraria</i>                   |            | TTTATT(T)AGGG | Galdieria genome database ( <a href="http://genomics.ms.u.edu/galdieria/">http://genomics.ms.u.edu/galdieria/</a> ) |                                               |
|             | Bangiophyceae    | <i>Porphyra umbilicalis</i>                    |            | ???TTAGGG     | NCBI-SRA Illumina                                                                                                   |                                               |
| Glaucophyta |                  | <i>Cyanophora paradoxa</i>                     |            | TTAGGG        | Rutgers                                                                                                             |                                               |
| Alveolata   | Ciliata          | <i>Tetrahymena thermophila</i>                 | TTGGGG     | TTGGGG        | AAGF03000000                                                                                                        | (Podlevsky et al. 2008)                       |
|             |                  | <i>Paramecium tetraurelia</i>                  | TT(T/G)GGG | TT(T/G)GGG    | CAAL01000000                                                                                                        | and references herein (Podlevsky et al. 2008) |
|             |                  | <i>Ichthyophthirius multifiliis</i>            |            | TTGGGG        | AEDN01000000                                                                                                        | and references herein (Ricard et al. 2008)    |
|             |                  | <i>Nyctotherus ovalis</i>                      | TTTTGGGG   |               |                                                                                                                     | (Podlevsky et al. 2008)                       |
|             |                  | <i>Sterkiella nova</i> ( <i>Oxytricha</i> )    | TTTTGGGG   |               |                                                                                                                     | and references herein (Podlevsky et al. 2008) |
| Alveolata   | Ciliata          | <i>Euplotes aediculatus</i>                    | TTTTGGGG   |               |                                                                                                                     | and references herein (Podlevsky et al. 2008) |
|             |                  | <i>Metopus es</i>                              | TTTTGGGG   |               |                                                                                                                     | and references herein (McGrath et al. 2007)   |

|                |                               |                                                 |                  |                  |               |                                               |
|----------------|-------------------------------|-------------------------------------------------|------------------|------------------|---------------|-----------------------------------------------|
|                |                               | <i>Chilodonella uncinata</i>                    | TTTGGG           |                  |               | (McGrath et al. 2007)                         |
|                |                               | <i>Uroleptus</i> sp.                            | TTTTGGGG         |                  |               | (Chang et al. 2006)                           |
| Apicomplexa    |                               | <i>Cryptosporidium parvum</i> Iowa II           | TTTAGG           | TTTAGG           | AAEE01000000  | (Podlevsky et al. 2008) and references herein |
|                |                               | <i>Toxoplasma gondii</i>                        |                  | TTTAGGG          | AAYL01000000, |                                               |
|                |                               | <i>Hammondia hammondi</i> strain H.H.34         |                  | TTTAGGG          | AHJH01000000  |                                               |
|                |                               | <i>Plasmodium falciparum</i> Dd2                | TT(T/C)AGGG      | TT(T/C)AGGG      | AASM01000000  | (Podlevsky et al. 2008) and references herein |
|                |                               | <i>Theileria parva</i>                          | TTTTAGGG/TTTAGGG | TTTTAGGG/TTTAGGG | AAGK01000000  |                                               |
|                |                               | <i>Theileria annulata</i>                       | TTTTAGGG         |                  |               | (Podlevsky et al. 2008) and references herein |
|                |                               | <i>Babesia bovis</i> T2Bo                       |                  | TTTAGGG          | AAXT01000000  |                                               |
|                |                               | <i>Eimeria tenella</i>                          | TTTAGGG          |                  |               | (Ling et al. 2007)                            |
| Perkinsea      |                               | <i>Perkinsus marinus</i> ATCC 50983             |                  | TTTCGGG          | AAXJ01000000  |                                               |
| Dinoflagellata |                               | <i>Cryptecodinium cohnii</i>                    | TTTAGGG          |                  |               | (Fojtova et al. 2010)                         |
|                |                               | <i>Karenia papilionacea</i>                     | TTTAGGG          |                  |               | (Fojtova et al. 2010)                         |
|                |                               | <i>Prorocentrum micans</i>                      | TTTAGGG          |                  |               | (Alverca et al. 2007)                         |
|                |                               | <i>Amphidinium carterae</i>                     | TTTAGGG          |                  |               | (Alverca et al. 2007)                         |
|                |                               | <i>Symbiodinium</i> sp.                         | TTTAGGG          |                  |               | (Zielke and Bodnar 2010)                      |
| Stramenopiles  | Labyrinthulida                | <i>Aurantiochytrium limacinum</i> ATCC MYA-1381 |                  | TTAGG            | JGI           |                                               |
|                | Opalinata                     | <i>Blastocystis hominis</i>                     |                  | TTAGGG           | CABX01000000  |                                               |
|                | Oomycetes                     | <i>Phytophthora sojae</i>                       |                  | TTTAGGG          | JGI           |                                               |
|                |                               | <i>Phytophthora capsici</i>                     |                  | TTTAGGG          | JGI           |                                               |
|                |                               | <i>Phytophthora infestans</i>                   | TTTAGGG          | TTTAGGG          | JGI           | (Pipe and Shaw 1997)                          |
|                |                               | <i>Hyaloperonospora arabidopsidis</i> Emoy2     |                  | TTTAGGG          | ABWE02000000  |                                               |
|                |                               | <i>Pseudoperonospora cubensis</i>               |                  | TTTAGGG          | AHJF01000000  |                                               |
|                |                               | <i>Pythium ultimum</i>                          |                  | TTTAGGG          | ADOS01000000  |                                               |
|                | Ochrophyta: Bacillariophyceae | <i>Thalassiosira pseudonana</i>                 | TTAGGG           | TTAGGG           | JGI           | (Armbrust et al. 2004)                        |
|                |                               | <i>Phaeodactylum tricornutum</i>                |                  | TTAGGG           | JGI           |                                               |
|                |                               | <i>Fragilariopsis cylindrus</i>                 |                  | TTAGGG           | JGI           |                                               |
|                | Ochrophyta: Eustigmatophyceae | <i>Nannochloropsis gaditana</i> CCMP526         |                  | TTAGGG??         | AGNI01000000  |                                               |
|                |                               | <i>Nannochloropsis oceanica</i>                 |                  | TTAGGG??         | AEUM01000000  |                                               |
|                | Ochrophyta: Pelagophyceae     | <i>Aureococcus anophagefferens</i>              |                  | TTAGGG           | JGI           |                                               |
| Stramenopiles  | Ochrophyta: Phaeophyceae      | <i>Ectocarpus siliculosus</i>                   | TTAGGG           |                  | CABU01000000  | (Cock et al. 2010)                            |
| Rhizaria       |                               | <i>Bigelowiella natans</i>                      | TTAGGG (TCTAGGG) | TTAGGG           | JGI           | (Gilson and McFadden)                         |

|               |               |                               |                         |           |                                                  |
|---------------|---------------|-------------------------------|-------------------------|-----------|--------------------------------------------------|
|               |               |                               |                         |           | 1995)                                            |
| Haptophyta    |               | <i>Emiliana huxleyi</i>       |                         | TTAGGG    | JGI                                              |
|               |               | <i>Phaeocystis antarctica</i> |                         | TTAGGG??? | TraceArchive                                     |
| Cryptomonadea | Cryptophyceae | <i>Guillardia theta</i>       | TTTAGGG (red alga like) | TTTAGGG   | JGI (Zauner et al. 2000)                         |
|               | Goniomonadida | <i>Goniomonas avonlea</i>     |                         | TTTAGGG   | Kim et al., unpublished genome sequence assembly |



**Fig. S1. Analysis of inhibitory effect of algal proteins to *Arabidopsis thaliana* telomerase.**

Activity of *A. thaliana* (A.th.) telomerase was not affected by addition of protein extracts from algal strains (Alga) representing groups without detected telomerase activity – Eustigmatophyceae (TEL133, TEL201), Bacillariophyceae (TEL231), Ulvophyceae (TEL94, TEL124), and Rhodophyta (TEL213, TEL214). Final protein amount (200 ng) was achieved by combination of protein extracts from *A. thaliana*, algal strains and bovine serum albumin (BSA); protein amounts in ng, including negative (-) and positive (+) controls.

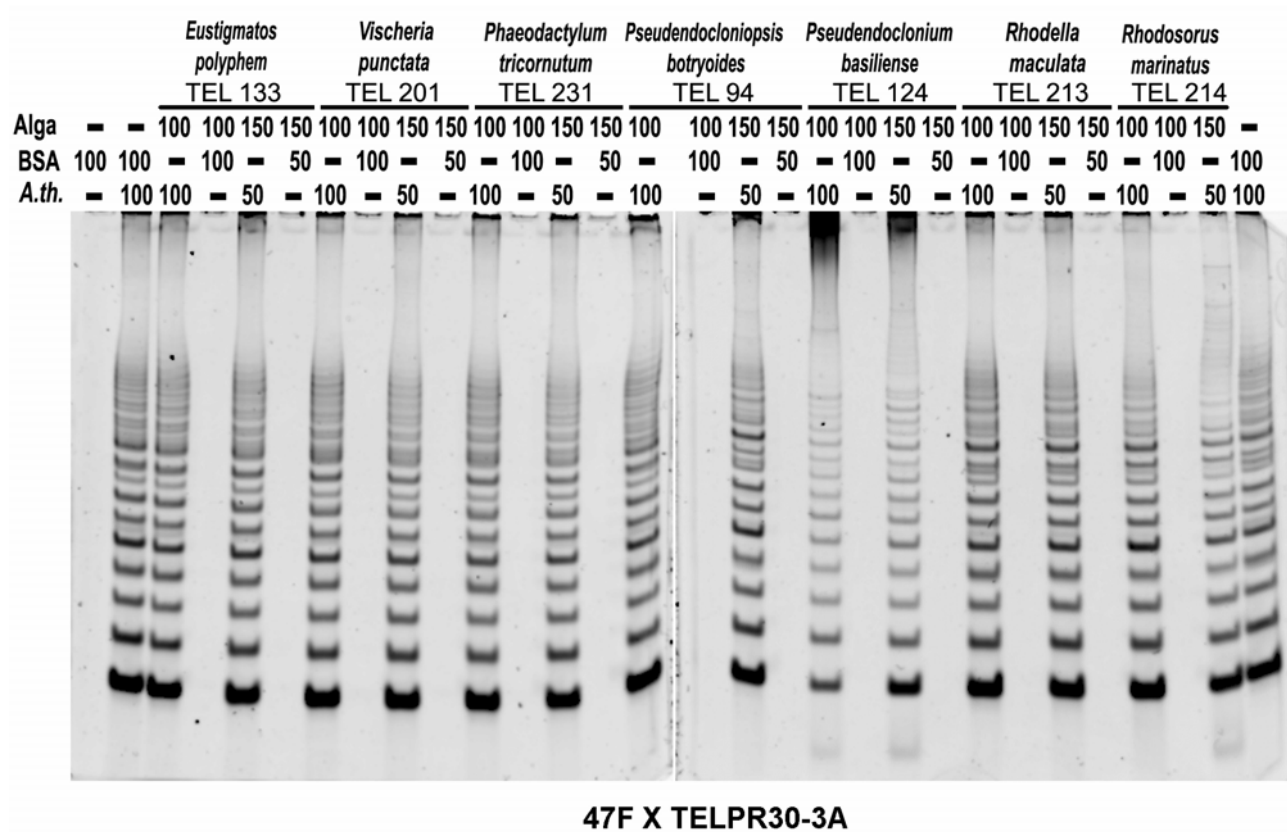

**Fig. S2. TRAP assay (A) and different primer usage in Trebouxiophyceae, Chlorophyceae (B) and Xanthophyceae (C) in telomerase template region (D).** The TRAP assay is performed in two steps (A). In the extension step, telomerase adds telomeric repeats to the 3' end of a substrate primer producing a mixture of single-stranded molecules differing by the number of added telomeric repeats. Products are then amplified in the second (PCR) step using a substrate primer in combination with a telomeric reverse primer. The periodicity of TRAP products resolved on PAA gel depends on minisatellite added by telomerase and its repeat length (shown for the *Arabidopsis*-type telomeric sequence with the 7-nt periodicity). Investigation of telomerase activity revealed different usage of the substrate primer pSSyF by representative algal telomerases and *Arabidopsis thaliana* telomerase. A significant difference in the ladder of TRAP products was observed (arrows) when the substrate primer pSSyF (B, C) was used in contrast to the substrate primer 47F (B). We presume that the difference resulted from different preferences of primer usage of algal telomerases (D) in comparison to the *Arabidopsis* telomerase. In contrast to *Jaagiella alpicola* (TEL84) that showed a similar TRAP pattern as the control *A. thaliana* (TTTAGGG), other Trebouxiophyceae displayed a shifted ladder of TRAP products (B). The Xanthophyceae strains (C) revealed a shifted ladder (arrows) in *Pleurochloris meiringensis* (TEL202) and no TRAP products in *Heterococcus protonematoides* (TEL204) when the substrate primer pSSyF was used. Examples of telomerase action are shown in (D) comprising a representative sequence of cloned TRAP products (on the left) and annealing onto putative RNA template region (on the right) for both types of TRAP ladders. The shortest TRAP product results from elongated substrate primer amplified with the reverse primer on the first possible site. The substrate oligonucleotide 47F (C) showed uniform TRAP products suggesting a similar annealing to the template region of *A. thaliana* and algal telomerase RNA subunits. The efficiency of telomerase purification (summarized in supplementary table S3) during preparation in protein extract (100 ng and 1 µg, triangles; or 1 µg of total protein) was monitored without PEG precipitation (crude, cr.), and in fractions non-precipitated (supernatant, sup.) and precipitated by PEG (telomerase extract, ex.). A telomerase-enriched extract (50 ng of

total protein) from *Chlamydomonas hydra* (+TTTTAGGG) was used as a positive control; negative control (-), no extract.

### A TRAP assay (two-step protocol)

1) addition of telomeric repeats

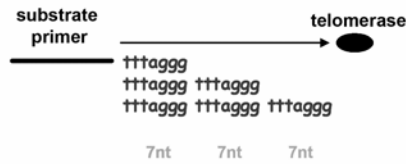

2) amplification of telomerase product by PCR

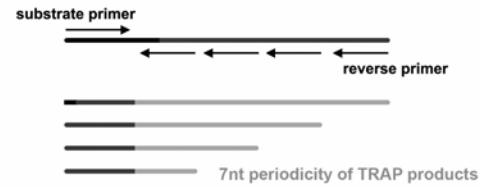

### B Chlorophyceae Trebouxiophyceae

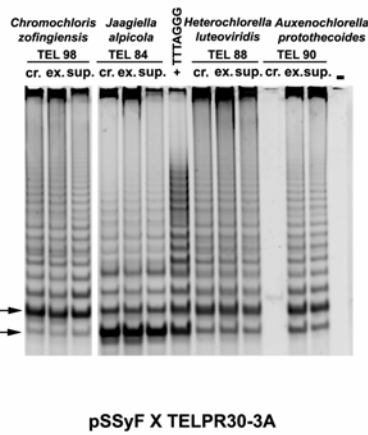

### C Xanthophyceae

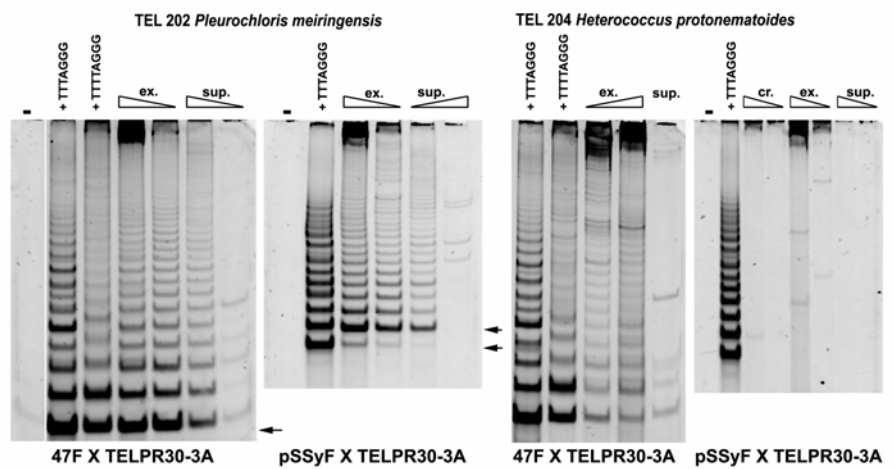

### D

TEL 84 *Jaagiella alpicola* (pSSyF X TELPR30-3A)

5'- CTTTTGAAAAATGGATGGGTTCTTGCTTGAATT **taggg t t aggg**..... -3'  
 substrate primer  
 3'- AAATCCCAAATCCCAAATCCAACCTTAAGCC 5'  
 reverse primer

TEL 98 *Chromochloris zofingiensis* (pSSyF X TELPR30-3A)

5'- CTTTTGAAAAATGGATGGGTTCTTGCTTGAATT **aggg t t t aggg**..... -3'  
 3'- AAATCCCAAATCCCAAATCCAACCTTAAGCC 5'

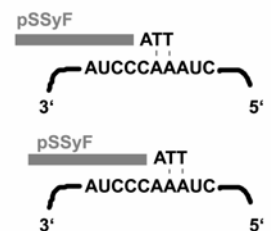

**Fig. S3. Analysis of telomeres in *Klebsormidium subtilissimum*.** An *Arabidopsis*-type probe (A, the left panel) produces only a negligible background signal, while the probe T4AG2 (A, right panel) provides a stronger signal ranging from 0.7 to 1.5 kb with restriction fragments produced by frequently cutting enzymes *TaqI*, *RsaI*, and *AluI* (lanes T, R and A, respectively); control samples of *Chlorella vulgaris* were digested with *MboI* and *TaqI* (lanes M, T). In subsequent analyses, high molecular weight samples were treated with BAL31 nuclease for 0, 15 or 60 min, and then digested by *SmaI* to produce longer TRFs (B). Shortening of high molecular weight fragments with duration of BAL31 digestion demonstrates terminal position of the fragments hybridizing with T4AG2\*- and *Chlamydomonas*-type (CHSB\*) probes. Hybridization patterns of both probes are identical both in higher molecular weight fraction (B, the upper panel) and the lower molecular weight fraction of TRFs (B, the lower panel).

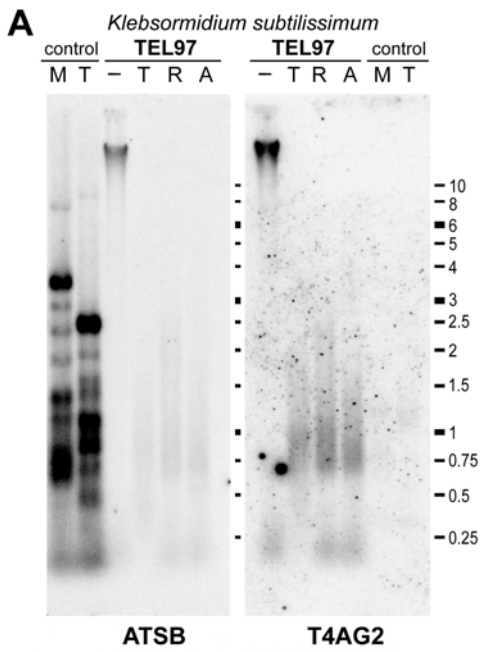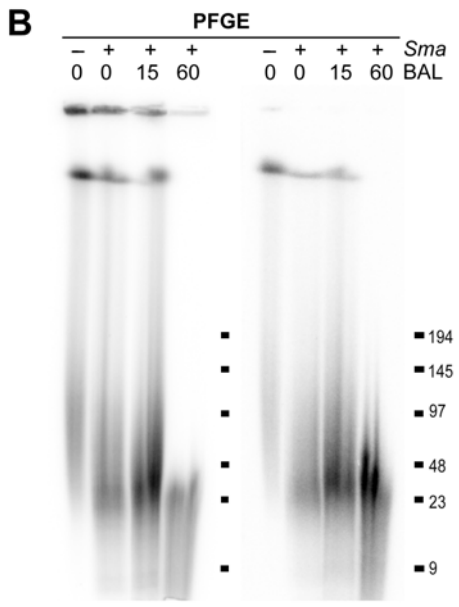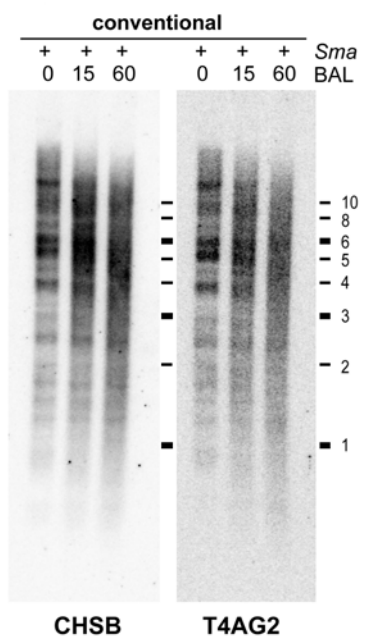

**Fig. S4. Analysis of telomeres in *Klebsormidium crenulatum* (A) and *Vischeria punctata* (B).**

The high molecular weight fraction of restriction fragments hybridizing with *Chlamydomonas*-type probe (CHSB\*) is sensitive to BAL31 treatment (A, the left panel), while the low molecular weight fragments are BAL31-resistant, which reflects their intrachromosomal (non-telomeric) positions (A, the right panel). In *Vischeria punctata* (B), an *Arabidopsis*-type probe (ATSB\*) does not provide any specific hybridization signal with either high-molecular-weight genomic DNA or its fragments produced by BAL31 and *Hind*III enzymes.

**A** *Klebsormidium crenulatum*

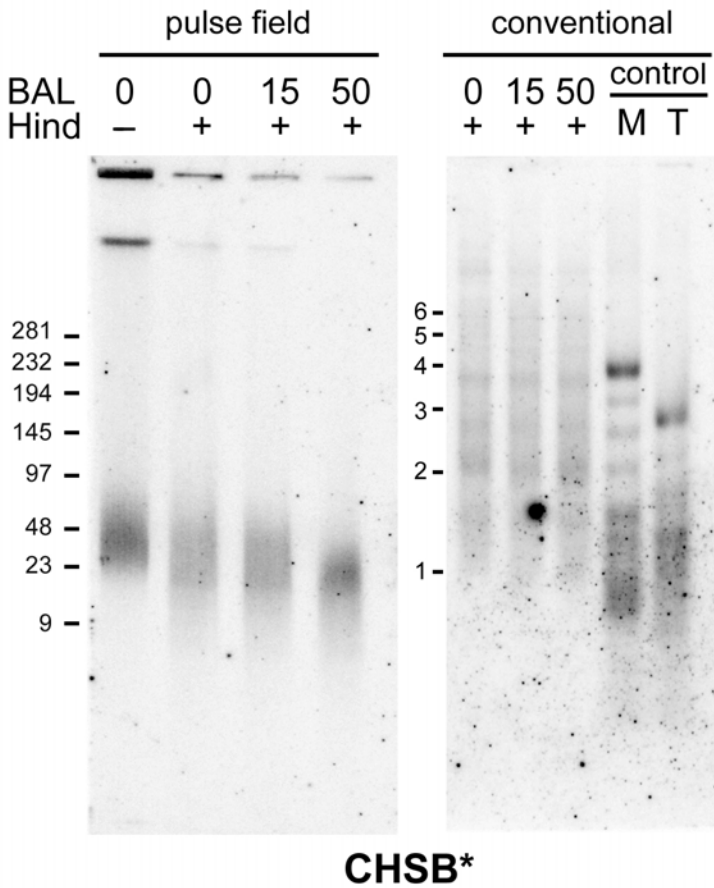

**B** *Vischeria punctata*

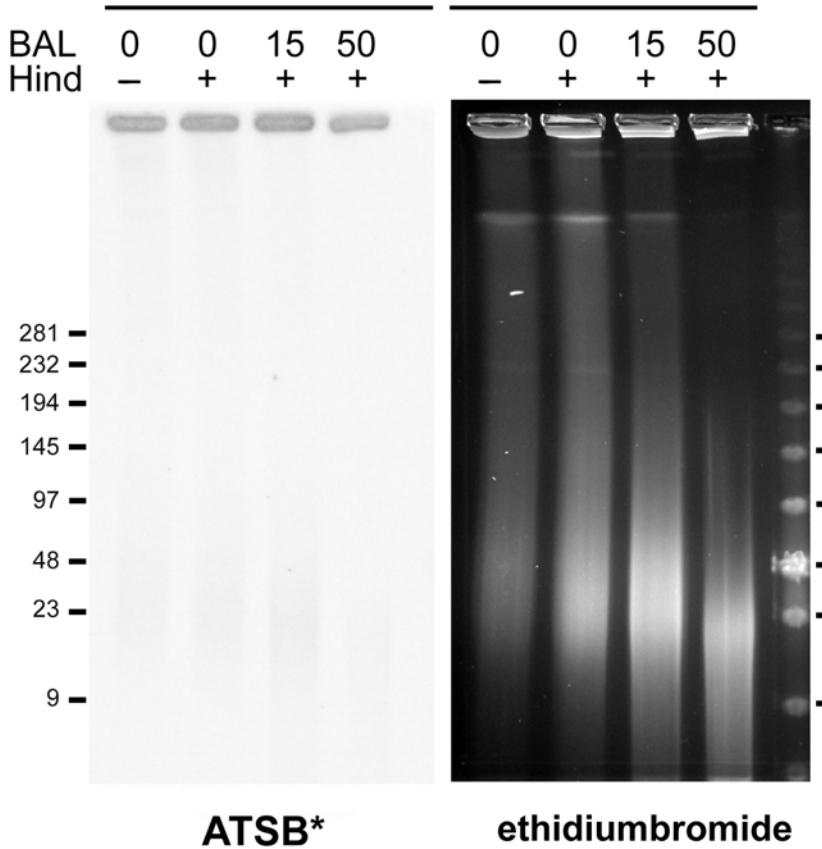

**Fig. S5. TRAP assay of rhodophytes.** Different results of a TRAP assay for *Porphyridium purpureum* (TEL131), *Rhodella maculata* (TEL213), and *Rhodosorus marinus* (TEL214) are shown, using sets of substrate primers 47F or TS21 and the human-type specific reverse primer HUTC. Red algal telomerase-enriched extracts containing 0.1 and 0.5  $\mu\text{g}$  of total protein (indicated with triangle) were analyzed. Amplification of the TRAP products in all three red algal species was achieved only using the substrate primer 47F. A verification experiment with 47F substrate primer and another reverse primer (also able to amplify the human telomeric sequence) excluded a substrate primer preference of telomerase and revealed a false-positive result. Telomerase-enriched extract (0.1  $\mu\text{g}$  of total protein) from *Euglena anabaena* (TEL185) was used as a pattern control of six-nucleotide periodicity ladder (TTAGGG); negative control (-), no extract.

### Rhodophyta

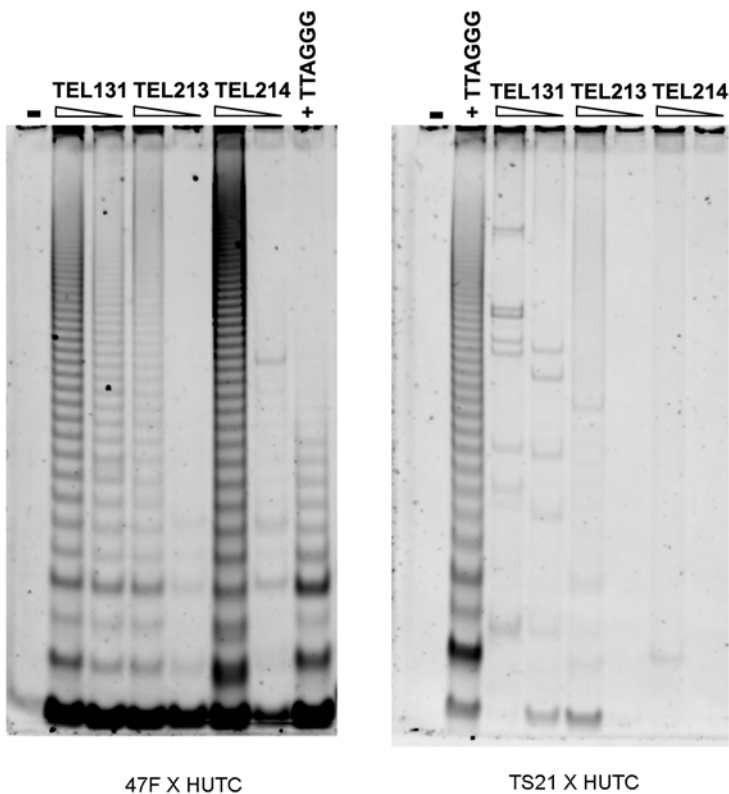



## Literature cited

- Adams SP, et al. 2001. Loss and recovery of Arabidopsis-type telomere repeat sequences 5'-(TTTAGGG)(n)-3' in the evolution of a major radiation of flowering plants. *Proceedings of the Royal Society London Biological Sciences*. 268: 1541-1546.
- Aimi T, Kano S, Iwasaki Y, Morinaga T. 2003. Telomeric fingerprinting of the violet root rot fungus, *Helicobasidium mompa*: a useful tool for karyotype estimation. *Mycol Res*. 107: 1055-1059.
- Aimi T, Kano S, Yotsutani Y, Morinaga T. 2002. Telomeric fingerprinting of the white root rot fungus, *Rosellinia necatrix*: a useful tool for strain identification. *FEMS Microbiol Lett*. 217: 95-101.
- Allshire RC, Dempster M, Hastie ND. 1989. Human telomeres contain at least three types of G-rich repeat distributed non-randomly. *Nucleic Acids Res*. 17: 4611-4627.
- Alverca E, et al. 2007. Telomeric DNA localization on dinoflagellate chromosomes: structural and evolutionary implications. *Cytogenet Genome Res*. 116: 224-231.
- Anokhin B, Hemmrich-Stanisak G, Bosch TCG. 2010. Karyotyping and single-gene detection using fluorescence in situ hybridization on chromosomes of *Hydra magnipapillata* (Cnidaria: Hydrozoa). *Comp Cytogenet*. 4: 97-110.
- Armbrust EV, et al. 2004. The genome of the diatom *Thalassiosira pseudonana*: ecology, evolution, and metabolism. *Science*. 306: 79-86.
- Berka RM, et al. 2011. Comparative genomic analysis of the thermophilic biomass-degrading fungi *Myceliophthora thermophila* and *Thielavia terrestris*. *Nat Biotechnol*. 29: 922-927.
- Cifuentes-Rojas C, Kannan K, Tseng L, Shippen DE. 2011. Two RNA subunits and POT1a are components of Arabidopsis telomerase. *Proc Natl Acad Sci U S A*. 108: 73-78.
- Cock JM, et al. 2010. The *Ectocarpus* genome and the independent evolution of multicellularity in brown algae. *Nature*. 465: 617-621.
- Coleman MJ, et al. 1993. Cloning and characterisation of telomeric DNA from *Cladosporium fulvum*. *Gene*. 132: 67-73.
- Consortium. IAG. 2010. Genome sequence of the pea aphid *Acyrtosiphon pisum*. *PLoS Biol*. 8: e1000313.
- Costa Castro LF, Holland WH. 2002. Fluorescent in situ Hybridisation to Amphioxus Chromosomes. *Zoological Science*. 19: 1349-1353.
- Cuomo CA, et al. 2007. The *Fusarium graminearum* genome reveals a link between localized polymorphism and pathogen specialization. *Science*. 317: 1400-1402.
- Derelle E, et al. 2006. Genome analysis of the smallest free-living eukaryote *Ostreococcus tauri* unveils many unique features. *Proc Natl Acad Sci U S A*. 103: 11647-11652.
- Edman JC. 1992. Isolation of telomerelike sequences from *Cryptococcus neoformans* and their use in high-efficiency transformation. *Mol Cell Biol*. 12: 2777-2783.
- Estabrooks SL. 1999. The telomeres of the bay scallop, *Argopecten irradians* (Lamarck). *J Shellfish Res*. 18: 401-404.
- Fajkus J. 2006. Detection of telomerase activity by the TRAP assay and its variants and alternatives. *Clin Chim Acta*. 371: 25-31.
- Fajkus J, et al. 1998. Plant cells express telomerase activity upon transfer to callus culture, without extensively changing telomere lengths. *Mol Gen Genet*. 260: 470-474.
- Fernandez-Fueyo E, et al. 2012. Comparative genomics of *Ceriporiopsis subvermispora* and *Phanerochaete chrysosporium* provide insight into selective ligninolysis. *Proc Natl Acad Sci U S A*. 109: 5458-5463.
- Fitzgerald MS, McKnight TD, Shippen DE. 1996. Characterization and developmental patterns of telomerase expression in plants. *Proceedings of the National Academy of Sciences of the United States of America*. 93: 14422-14427.
- Fojtova M, Fulneckova J, Fajkus J, Kovarik A. 2002. Recovery of tobacco cells from cadmium stress is accompanied by DNA repair and increased telomerase activity. *J Exp Bot*. 53: 2151-

- Fojtova M, et al. 2010. Telomere maintenance in liquid crystalline chromosomes of dinoflagellates. *Chromosoma*. 119: 485-493.
- Fu G, Barker DC. 1998. Characterisation of *Leishmania* telomeres reveals unusual telomeric repeats and conserved telomere-associated sequence. *Nucleic Acids Res*. 26: 2161-2167.
- Fuchs J, Brandes A, Schubert I. 1995. Telomere sequence localization and karyotype evolution in higher plants. *Pl. Syst. Evol*. 196: 227-241.
- Fuchs J, Schubert I. 1996. Arabidopsis-type telomere sequences on chromosome termini of *Selaginella martensii* Spring (Pteridophyta). *Biol Zbl*. 115: 260-265.
- Fulneckova J, et al. 2012. Dynamic evolution of telomeric sequences in the green algal order Chlamydomonadales. *Genome Biol Evol*. 4: 248-264.
- Gallardo-Escarate C, et al. 2005. Fluorescence in situ hybridization of rDNA, telomeric (TTAGGG)<sub>n</sub> and (GATA)<sub>n</sub> repeats in the red abalone *Haliotis rufescens* (Archaeogastropoda: Haliotidae). *Hereditas*. 142: 73-79.
- Gilson P, McFadden GI. 1995. The chlorarachniophyte: a cell with two different nuclei and two different telomeres. *Chromosoma*. 103: 635-641.
- Heidel AJ, et al. 2011. Phylogeny-wide analysis of social amoeba genomes highlights ancient origins for complex intercellular communication. *Genome Res*. 21: 1882-1891.
- Higashiyama T, Maki S, Yamada T. 1995. Molecular organization of *Chlorella vulgaris* chromosome I: presence of telomeric repeats that are conserved in higher plants. *Mol Gen Genet*. 246: 29-36.
- Hijri M, Niculita H, Sanders IR. 2007. Molecular characterization of chromosome termini of the arbuscular mycorrhizal fungus *Glomus intraradices* (Glomeromycota). *Fungal Genet Biol*. 44: 1380-1386.
- Hirai H, LoVerde PT. 1996. Identification of the telomeres on *Schistosoma mansoni* chromosomes by FISH. *J Parasitol*. 82: 511-512.
- Chang WJ, Kuo S, Landweber LF. 2006. A new scrambled gene in the ciliate *Uroleptus*. *Gene*. 368: 72-77.
- Chen JL, Blasco MA, Greider CW. 2000. Secondary structure of vertebrate telomerase RNA. *Cell*. 100: 503-514.
- Inglis P, Sarmiento R, Gaviao CFC, Valadares-Inglis MC. 2005. DNA fingerprinting of *Paecilomyces* strains of potential use for the biological control of pests. *World J Microb Biot*. 21: 1487-1492.
- Jha AN, et al. 1995. Localization of a vertebrate telomeric sequence in the chromosomes of two marine worms (phylum Annelida: class polychaeta). *Chromosome Res*. 3: 507-508.
- Kelleher C, Teixeira MT, Forstemann K, Lingner J. 2002. Telomerase: biochemical considerations for enzyme and substrate. *Trends Biochem Sci*. 27: 572-579.
- Koziol C, Borojevic R, Steffen R, Muller WE. 1998. Sponges (Porifera) model systems to study the shift from immortal to senescent somatic cells: the telomerase activity in somatic cells. *Mech Ageing Dev*. 100: 107-120.
- Kusumoto KI, Suzuki S, Kashiwagi Y. 2003. Telomeric repeat sequence of *Aspergillus oryzae* consists of dodeca-nucleotides. *Appl Microbiol Biotechnol*. 61: 247-251.
- Lang GH, Wang Y, Nomura N, Matsumura M. 2004. Detection of telomerase activity in tissues and primary cultured lymphoid cells of *Penaeus japonicus*. *Mar Biotechnol (NY)*. 6: 347-354.
- Le Blancq SM, Kase RS, Van der Ploeg LH. 1991. Analysis of a *Giardia lamblia* rRNA encoding telomere with [TAGGG]<sub>n</sub> as the telomere repeat. *Nucleic Acids Res*. 19: 5790.
- Leclair S, Ansan-Melayah D, Rouxel T, Balesdent M. 1996. Meiotic behaviour of the minichromosome in the phytopathogenic ascomycete *Leptosphaeria maculans*. *Curr Genet*. 30: 541-548.
- Levis C, et al. 1997. Telomeric DNA of *Botrytis cinerea*: a useful tool for strain identification. *FEMS Microbiol Lett*. 157: 267-272.
- Ling KH, et al. 2007. Sequencing and analysis of chromosome 1 of *Eimeria tenella* reveals a unique

- segmental organization. *Genome Res.* 17: 311-319.
- Liu C, Schroeder AA, Kapur V, Abrahamsen MS. 1998. Telomeric sequences of *Cryptosporidium parvum*. *Mol Biochem Parasitol.* 94: 291-296.
- Ma LJ, et al. 2009. Genomic analysis of the basal lineage fungus *Rhizopus oryzae* reveals a whole-genome duplication. *PLoS Genet.* 5: e1000549.
- Martinez D, et al. 2008. Genome sequencing and analysis of the biomass-degrading fungus *Trichoderma reesei* (syn. *Hypocrea jecorina*). *Nat Biotechnol.* 26: 553-560.
- McGrath CL, Zufall RA, Katz LA. 2007. Variation in macronuclear genome content of three ciliates with extensive chromosomal fragmentation: a preliminary analysis. *J Eukaryot Microbiol.* 54: 242-246.
- Monti V, et al. 2011. Presence of a functional (TTAGG)(n) telomere-telomerase system in aphids. *Chromosome Res.* 19: 625-633.
- Mravinac B, Mestrovic N, Cavrak VV, Plohl M. 2011. TCAGG, an alternative telomeric sequence in insects. *Chromosoma.* 120: 367-376.
- Nepelchova K, Sykorova E, Fajkus J. 2005. Comparison of different kinds of probes used for analysis of variant telomeric sequences. *Biophys Chem.* 117: 225-231.
- Nozaki H, et al. 2007. A 100%-complete sequence reveals unusually simple genomic features in the hot-spring red alga *Cyanidioschyzon merolae*. *BMC Biol.* 5: 28.
- Perez G, Pangilinan J, Pisabarro AG, Ramirez L. 2009. Telomere organization in the ligninolytic basidiomycete *Pleurotus ostreatus*. *Appl Environ Microbiol.* 75: 1427-1436.
- Petracek ME, Lefebvre PA, Silflow CD, Berman J. 1990. *Chlamydomonas* telomere sequences are A+T-rich but contain three consecutive G-C base pairs. *Proc Natl Acad Sci U S A.* 87: 8222-8226.
- Pipe ND, Shaw DS. 1997. Telomere-associated restriction fragment length polymorphisms in *Phytophthora infestans*. *Molecular Plant Pathology On-Line.*
- Plohl M, et al. 2002. Telomeric localization of the vertebrate-type hexamer repeat, (TTAGGG)<sub>n</sub>, in the wedgeshell clam *Donax trunculus* and other marine invertebrate genomes. *J Biol Chem.* 277: 19839-19846.
- Podlevsky JD, et al. 2008. The telomerase database. *Nucleic Acids Research.* 36: D339-343.
- Ramirez L, et al. 2011.** Basidiomycetes Telomeres – A Bioinformatics Approach. In: Mahdavi MA ed. *Bioinformatics – Trends and Methodologies*: InTech.
- Rensing SA, et al. 2008. The *Physcomitrella* genome reveals evolutionary insights into the conquest of land by plants. *Science.* 319: 64-69.
- Ricard G, et al. 2008. Macronuclear genome structure of the ciliate *Nyctotherus ovalis*: single-gene chromosomes and tiny introns. *BMC Genomics.* 9: 587.
- Robertson HM. 2009. The choanoflagellate *Monosiga brevicollis* karyotype revealed by the genome sequence: telomere-linked helicase genes resemble those of some fungi. *Chromosome Res.* 17: 873-882.
- Sakai M, et al. 2007. Identification of a telomere sequence type in three sponge species (Porifera) by fluorescence in situ hybridization analysis. *Fisheries Science.* 73: 77-80.
- Sanchez-Alonso P, Valverde ME, Paredes-Lopez O, Guzman P. 1996. Detection of genetic variation in *Ustilago maydis* strains by probes derived from telomeric sequences. *Microbiology.* 142 (Pt 10): 2931-2936.
- Shakirov EV, et al. 2010. Protection of Telomeres 1 is required for telomere integrity in the moss *Physcomitrella patens*. *Plant Cell.* 22: 1838-1848.
- Sinclair CS, Richmond RH, Ostrander GK. 2007. Characterization of the telomere regions of scleractinian coral, *Acropora surculosa*. *Genetica.* 129: 227-233.
- Stajich JE, et al. 2010. Insights into evolution of multicellular fungi from the assembled chromosomes of the mushroom *Coprinopsis cinerea* (*Coprinus cinereus*). *Proc Natl Acad Sci U S A.* 107: 11889-11894.
- Suzuki K. 2004. Characterization of telomere DNA among five species of pteridophytes and bryophytes. *Journal of Bryology.* 26: 175-180.

- Sykorova E, et al. 2006a. Minisatellite telomeres occur in the family Alliaceae but are lost in *Allium*. *American Journal of Botany*. 93: 814-823.
- Sykorova E, Leitch AR, Fajkus J. 2006b. Asparagales telomerases which synthesize the human type of telomeres. *Plant Mol Biol*. 60: 633-646.
- Sykorova E, et al. 2003. Telomere variability in the monocotyledonous plant order Asparagales. *Proceedings. Biological sciences*. 270: 1893-1904.
- Tan TC, et al. 2012. Telomere maintenance and telomerase activity are differentially regulated in asexual and sexual worms. *Proc Natl Acad Sci U S A*. 109: 4209-4214.
- Traut W, et al. 2007. The telomere repeat motif of basal Metazoa. *Chromosome Res*. 15: 371-382.
- Van der Ploeg LH, Liu AY, Borst P. 1984. Structure of the growing telomeres of Trypanosomes. *Cell*. 36: 459-468.
- Viaud M, Couteaudier Y, Levis C, Riba G. 1996. Genome Organization in *Beauveria bassiana*: Electrophoretic Karyotype, Gene Mapping, and Telomeric Fingerprint. *Fungal Genetics and Biology*. 20: 175-183.
- Vitturi R, Colomba MS, Pirrone AM, Mandrioli M. 2002a. rDNA (18S-28S and 5S) colocalization and linkage between ribosomal genes and (TTAGGG)(n) telomeric sequence in the earthworm, *Octodrilus complanatus* (Annelida: Oligochaeta: Lumbricidae), revealed by single- and double-color FISH. *J Hered*. 93: 279-282.
- Vitturi R, et al. 2002b. Chromosome analysis and FISH mapping of ribosomal DNA (rDNA), telomeric (TTAGGG)n and (GATA)n repeats in the leech *Haemopsis sanguisuga* (L.) (Annelida: Hirudinea). *Genetica*. 115: 189-194.
- Weiss-Schneeweiss H, et al. 2004. Chromosome termini of the monocot plant *Othocallis siberica* are maintained by telomerase, which specifically synthesises vertebrate-type telomere sequences. *Plant J*. 37: 484-493.
- Zauner S, et al. 2000. Chloroplast protein and centrosomal genes, a tRNA intron, and odd telomeres in an unusually compact eukaryotic genome, the cryptomonad nucleomorph. *Proc Natl Acad Sci U S A*. 97: 200-205.
- Zielke S, Bodnar A. 2010. Telomeres and telomerase activity in scleractinian corals and *Symbiodinium* spp. *Biol Bull*. 218: 113-121.
